# Supplementary material for: Dopamine enhances model-free credit assignment through boosting of retrospective model-based inference
Source: eLife journal article supplement (doi:10.7554/elife.67778), 2021-12-09
Supplement: supp [file elife-67778-supp-v1.zip]

Archive with 1 entries (1 files):
- elife_poa_e67778_Transparent_Reporting_File.pdf
